# Supplementary material for: A hierarchy of cell death pathways confers layered resistance to shigellosis in mice
Source: eLife journal article supplement (doi:10.7554/elife.83639), 2023-01-16

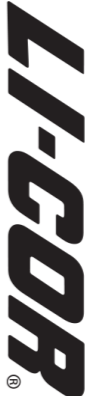

Image ID: 0000809\_01  
Acquire Time: Nov 17, 2020 2:03:48 PM

Acquisition Information

| # | Image ID   | Acquire Time            | Channels | Resolution | Intensities | Quality | Analysis | Image Name | Comment |
|---|------------|-------------------------|----------|------------|-------------|---------|----------|------------|---------|
| 1 | 0000809_01 | Nov 17, 2020 2:03:48 PM | 700      | 169um      | Auto        | lowest  | Manual   | 0000809_01 |         |

Image Display Values

| Channel | Color                       | Minimum | Maximum | K |
|---------|-----------------------------|---------|---------|---|
| 700     | Gray Scale (Black on White) | 1.18    | 6.82    | 0 |

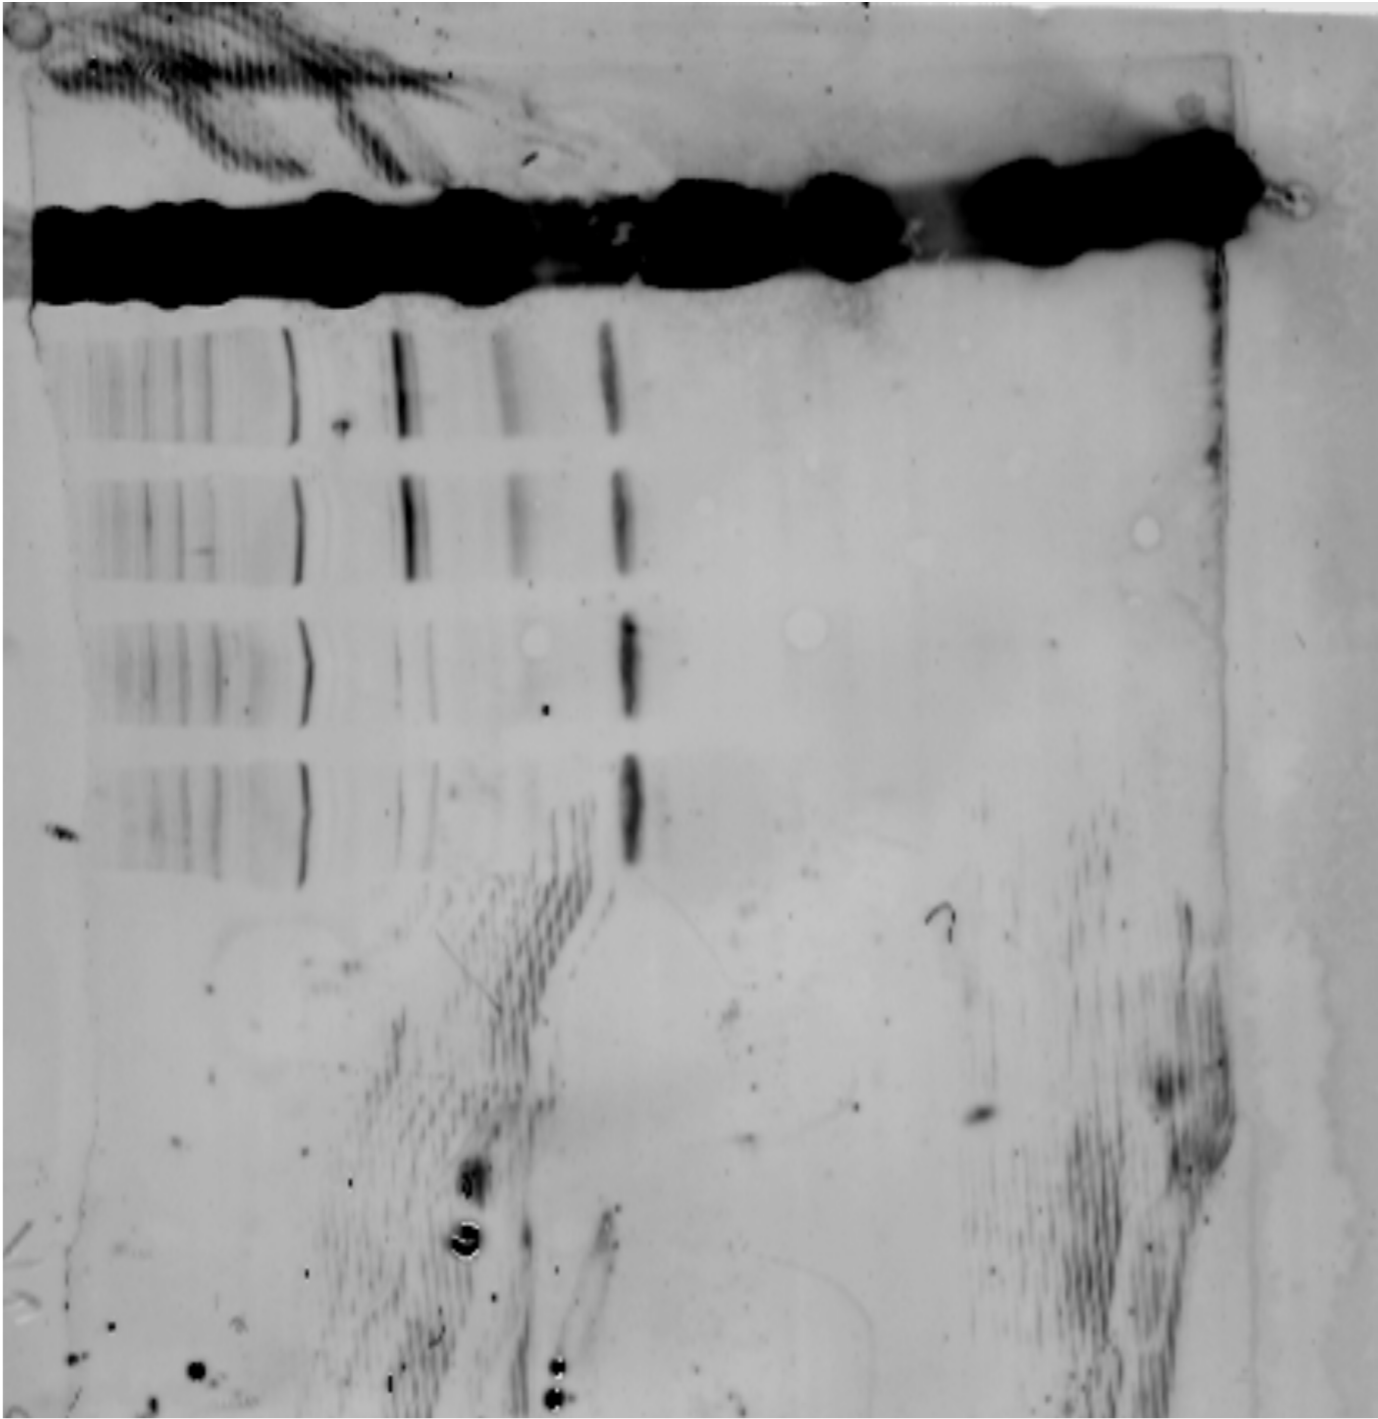

Supplement: supp [file Casp11KO_rawblot.pdf › Figure 2 - figure supplement 1 - source data 1/Casp11KO_rawblot.pdf]
