# Supplementary figures and images for: A hierarchy of cell death pathways confers layered resistance to shigellosis in mice
Source: eLife journal article supplement (doi:10.7554/elife.83639), 2023-01-16

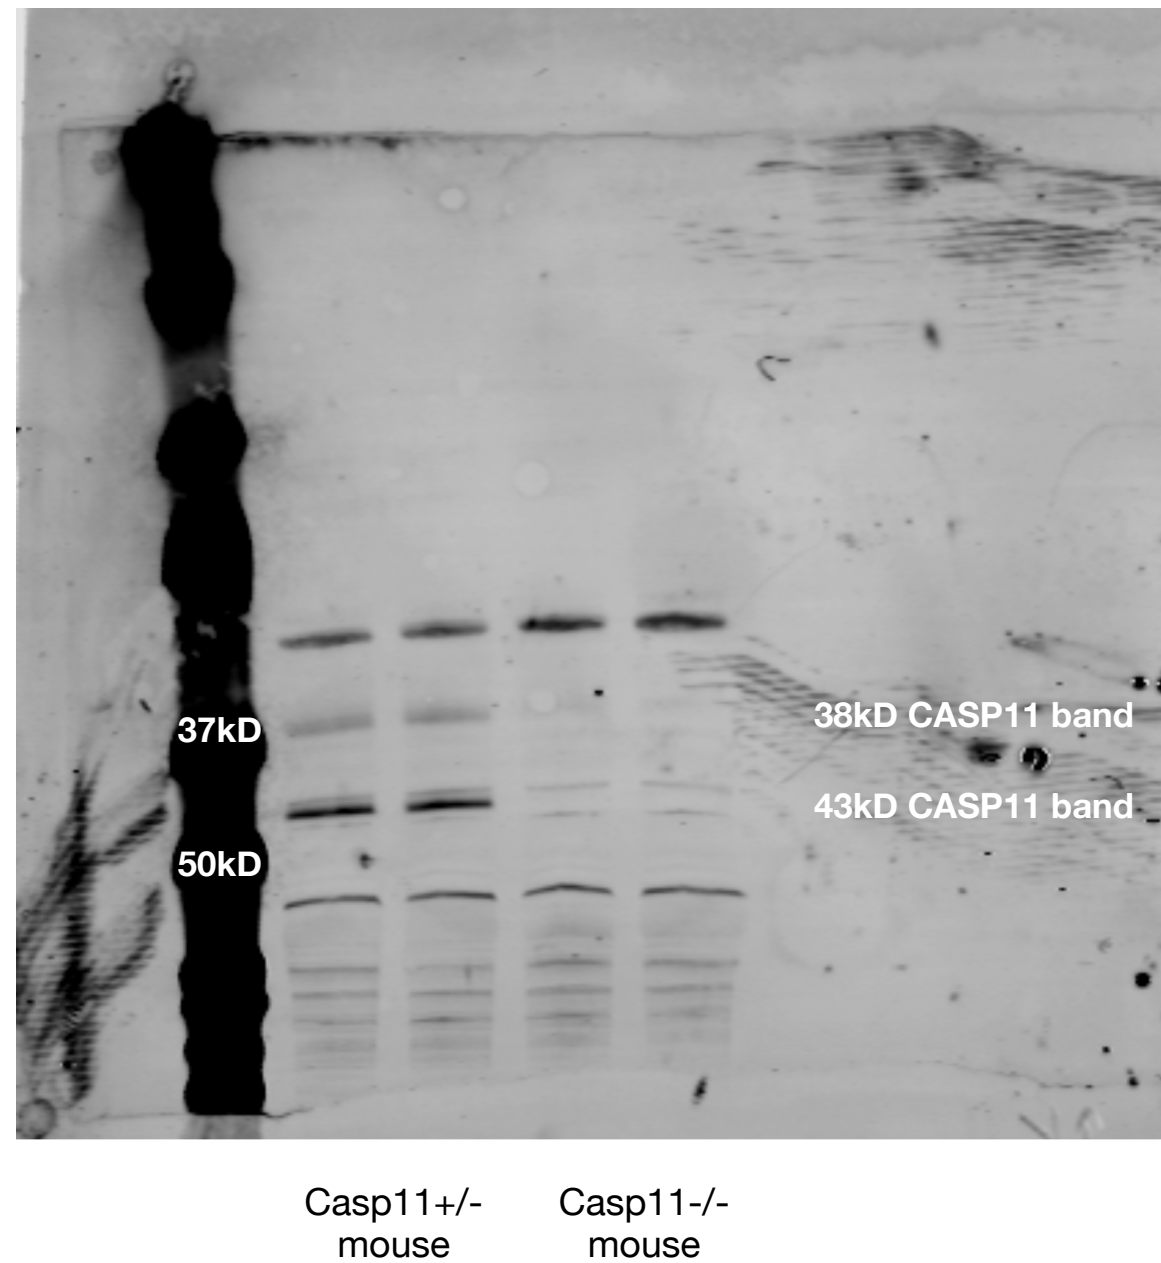

(Gel is inverted vertically in figure 2 – figure supplement 1 for more readable orientation)

Supplement: supp [file Casp11KO_labeleduncroppedblot.pdf › Figure 2 - figure supplement 1 - source data 1/Casp11KO_labeleduncroppedblot.pdf]

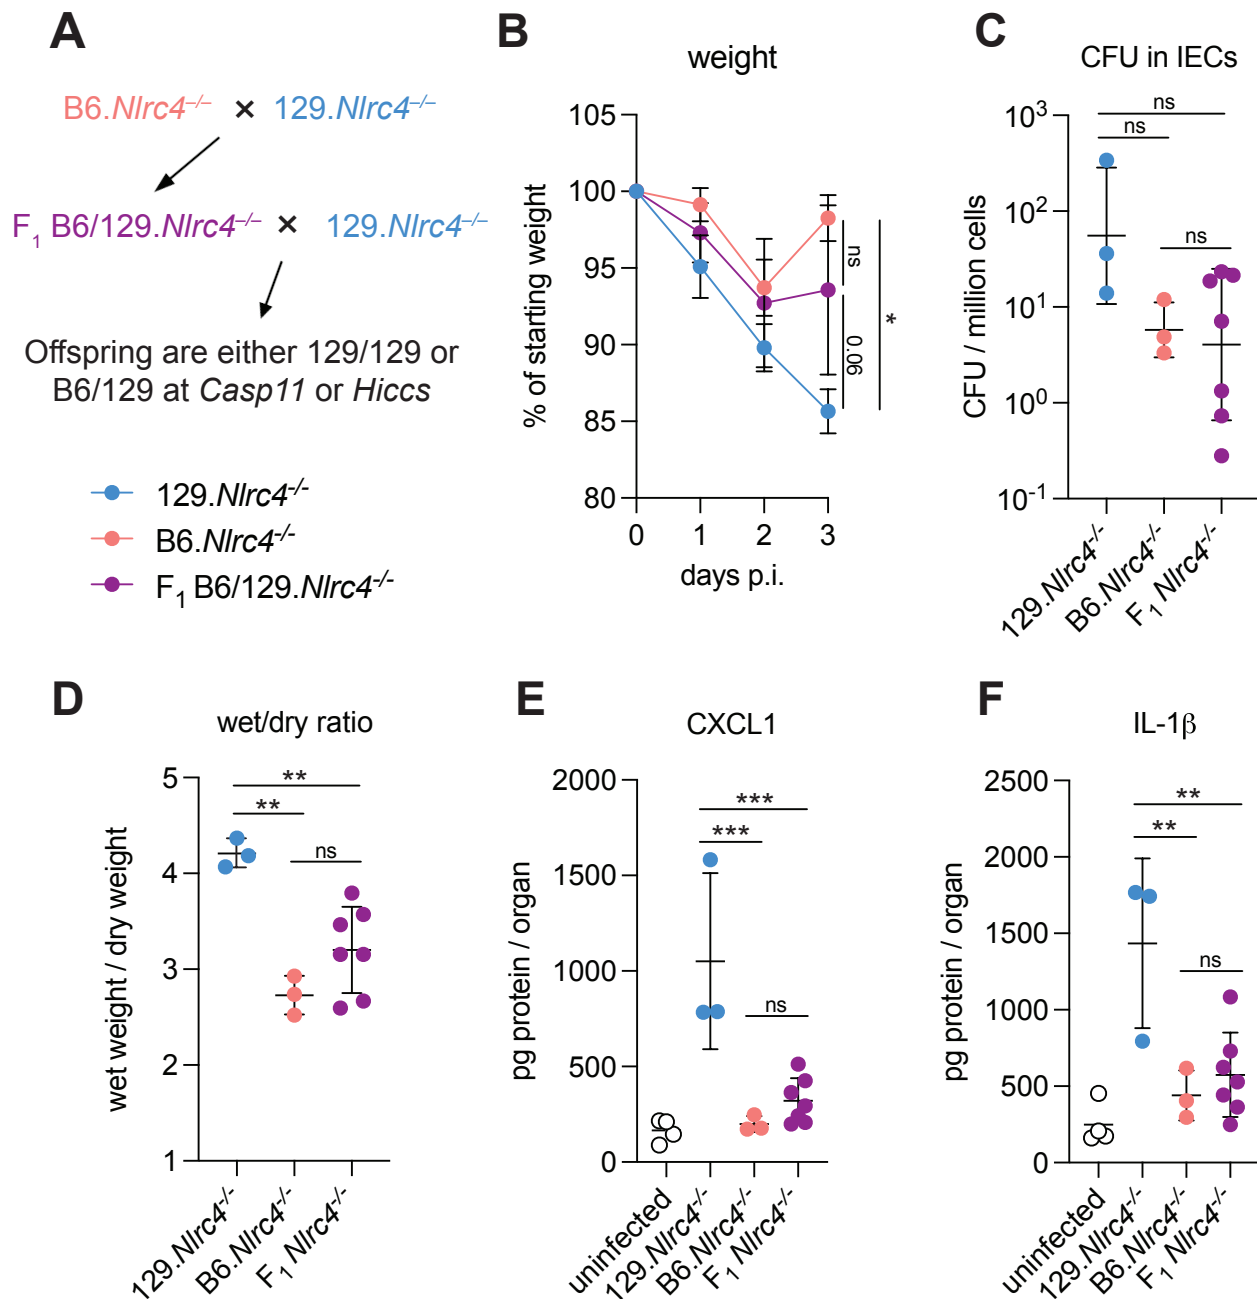

Supplement: supp [file elife_poa_e83639_Figure_1_figure_supplement_1.pdf › elife_poa_e83639_Figure_1_figure_supplement_1.pdf]

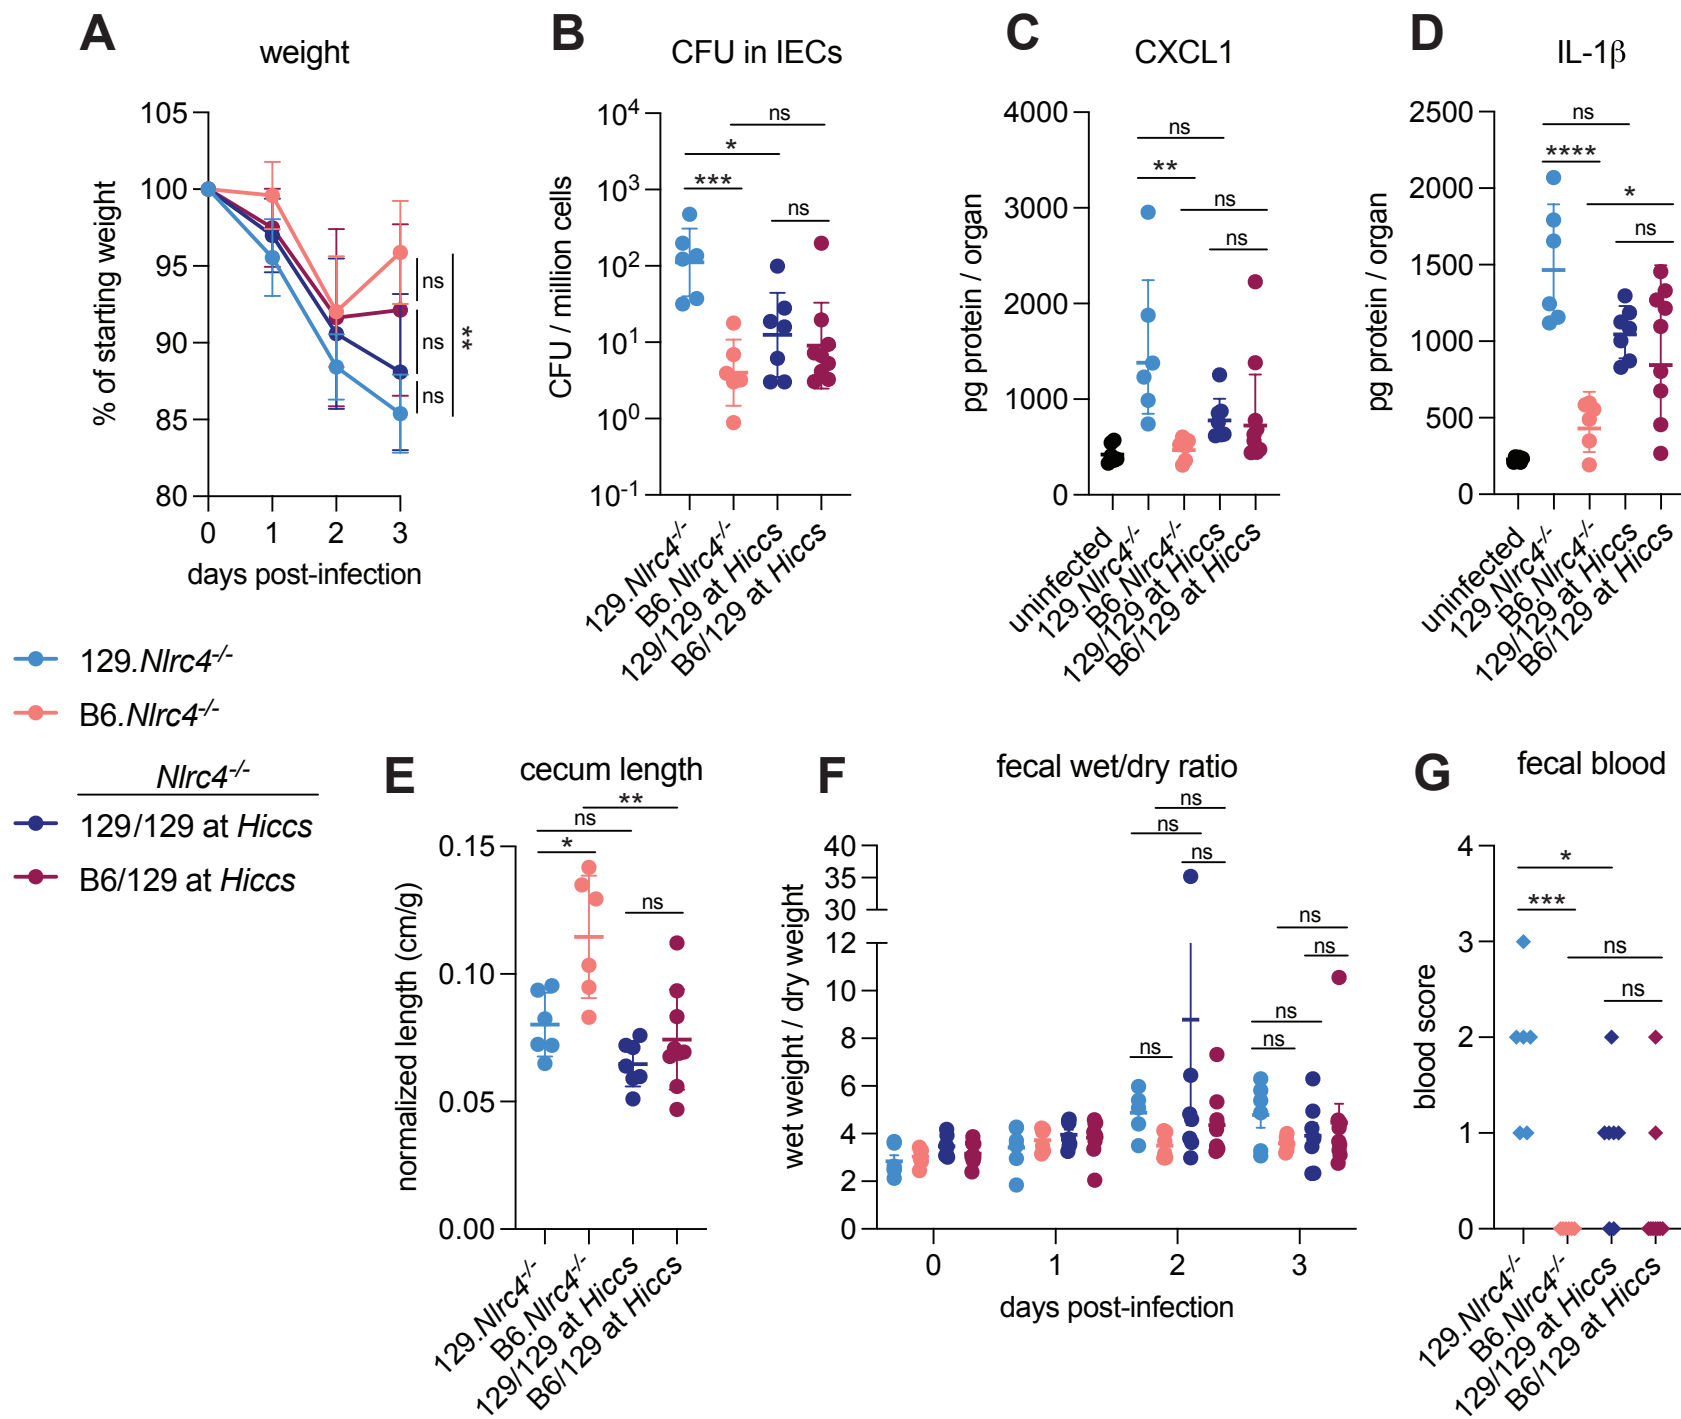

Supplement: supp [file elife_poa_e83639_Figure_1_figure_supplement_2.pdf › elife_poa_e83639_Figure_1_figure_supplement_2.pdf]

**A**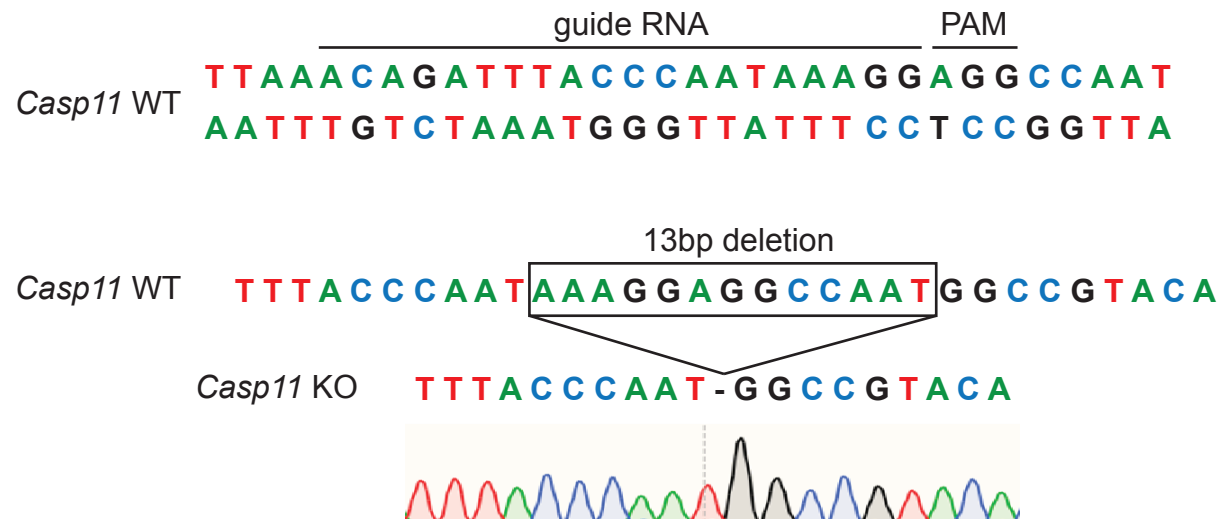**B**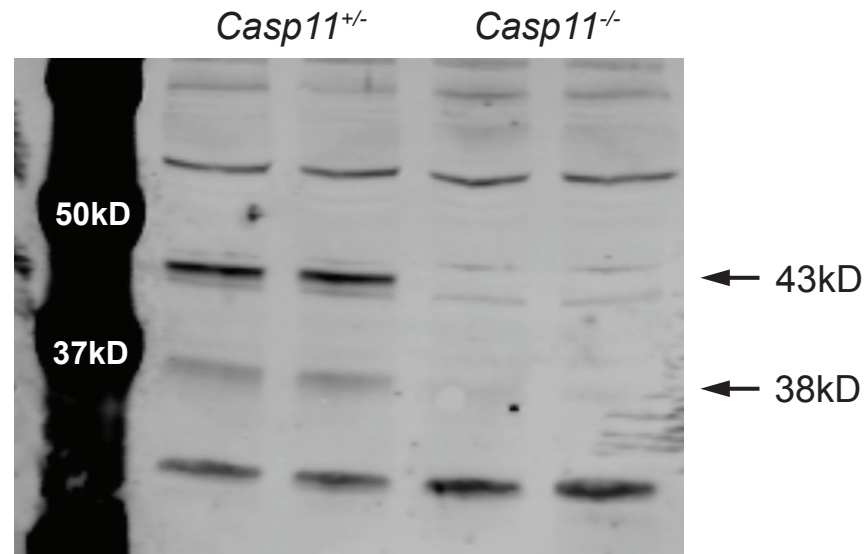

Supplement: supp [file elife_poa_e83639_Figure_2_figure_supplement_1.pdf › elife_poa_e83639_Figure_2_figure_supplement_1.pdf]

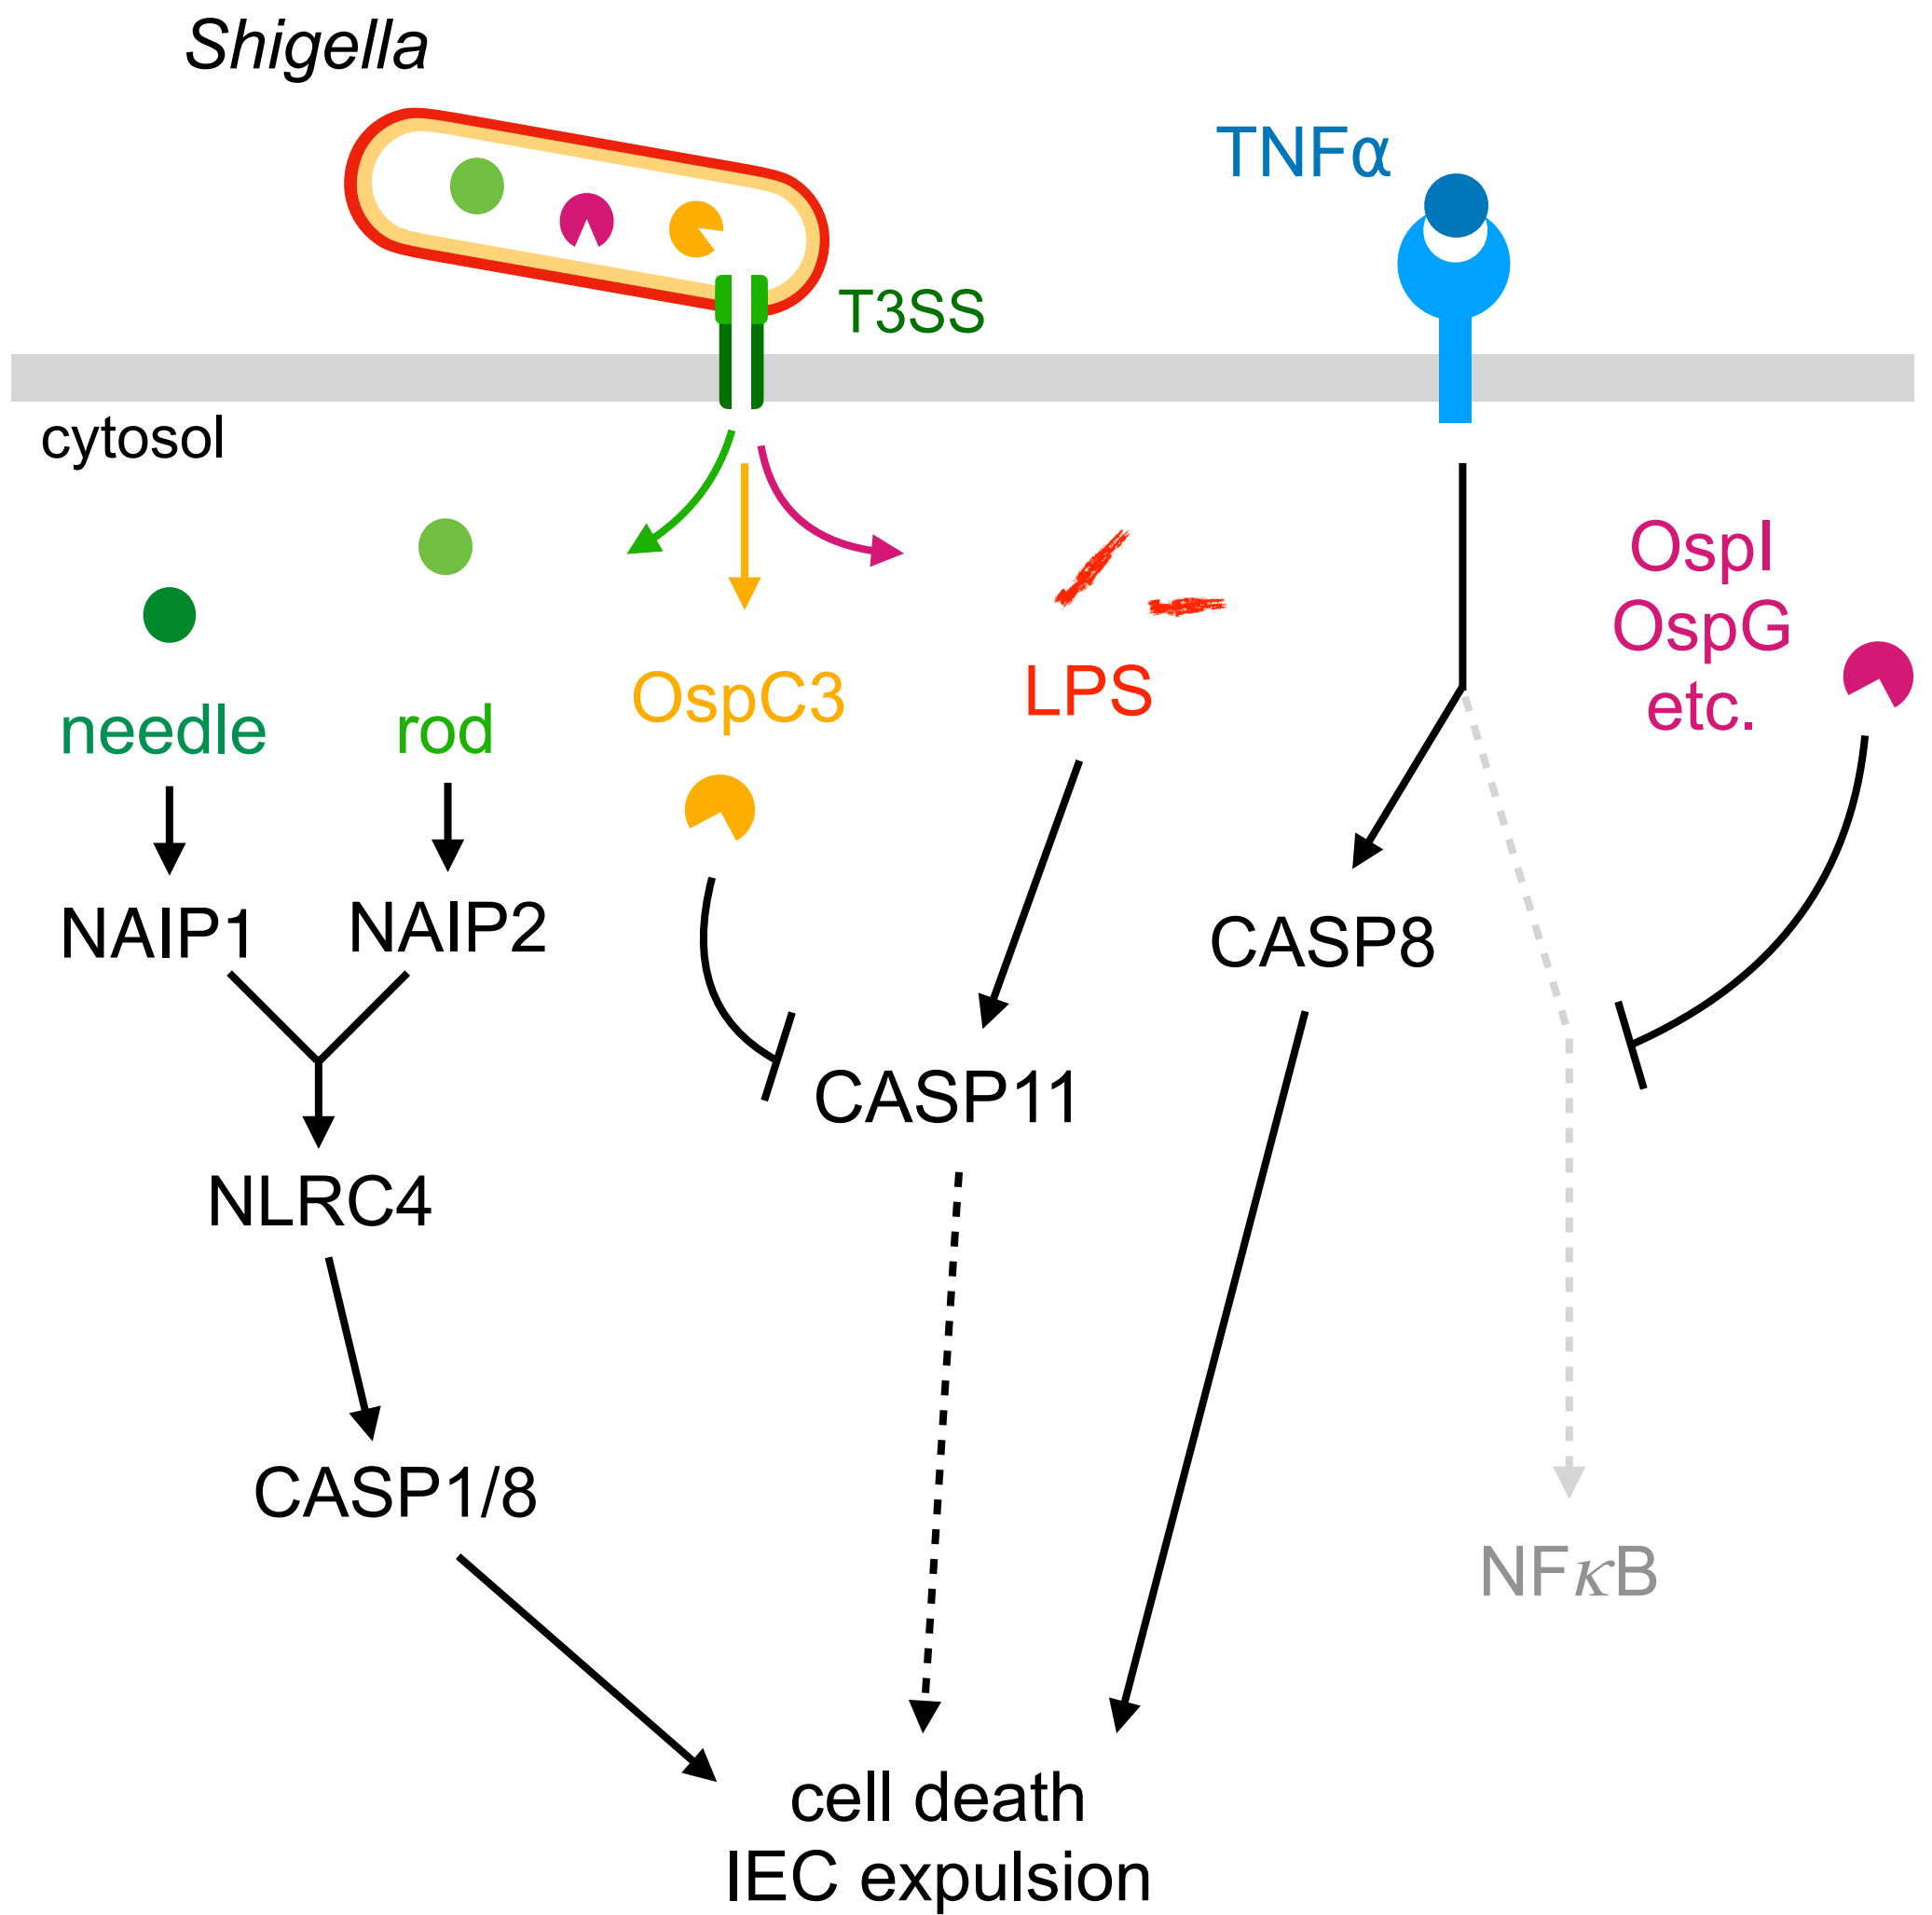

Supplement: supp [file elife_poa_e83639_Figure_2_figure_supplement_2.pdf › elife_poa_e83639_Figure_2_figure_supplement_2.pdf]

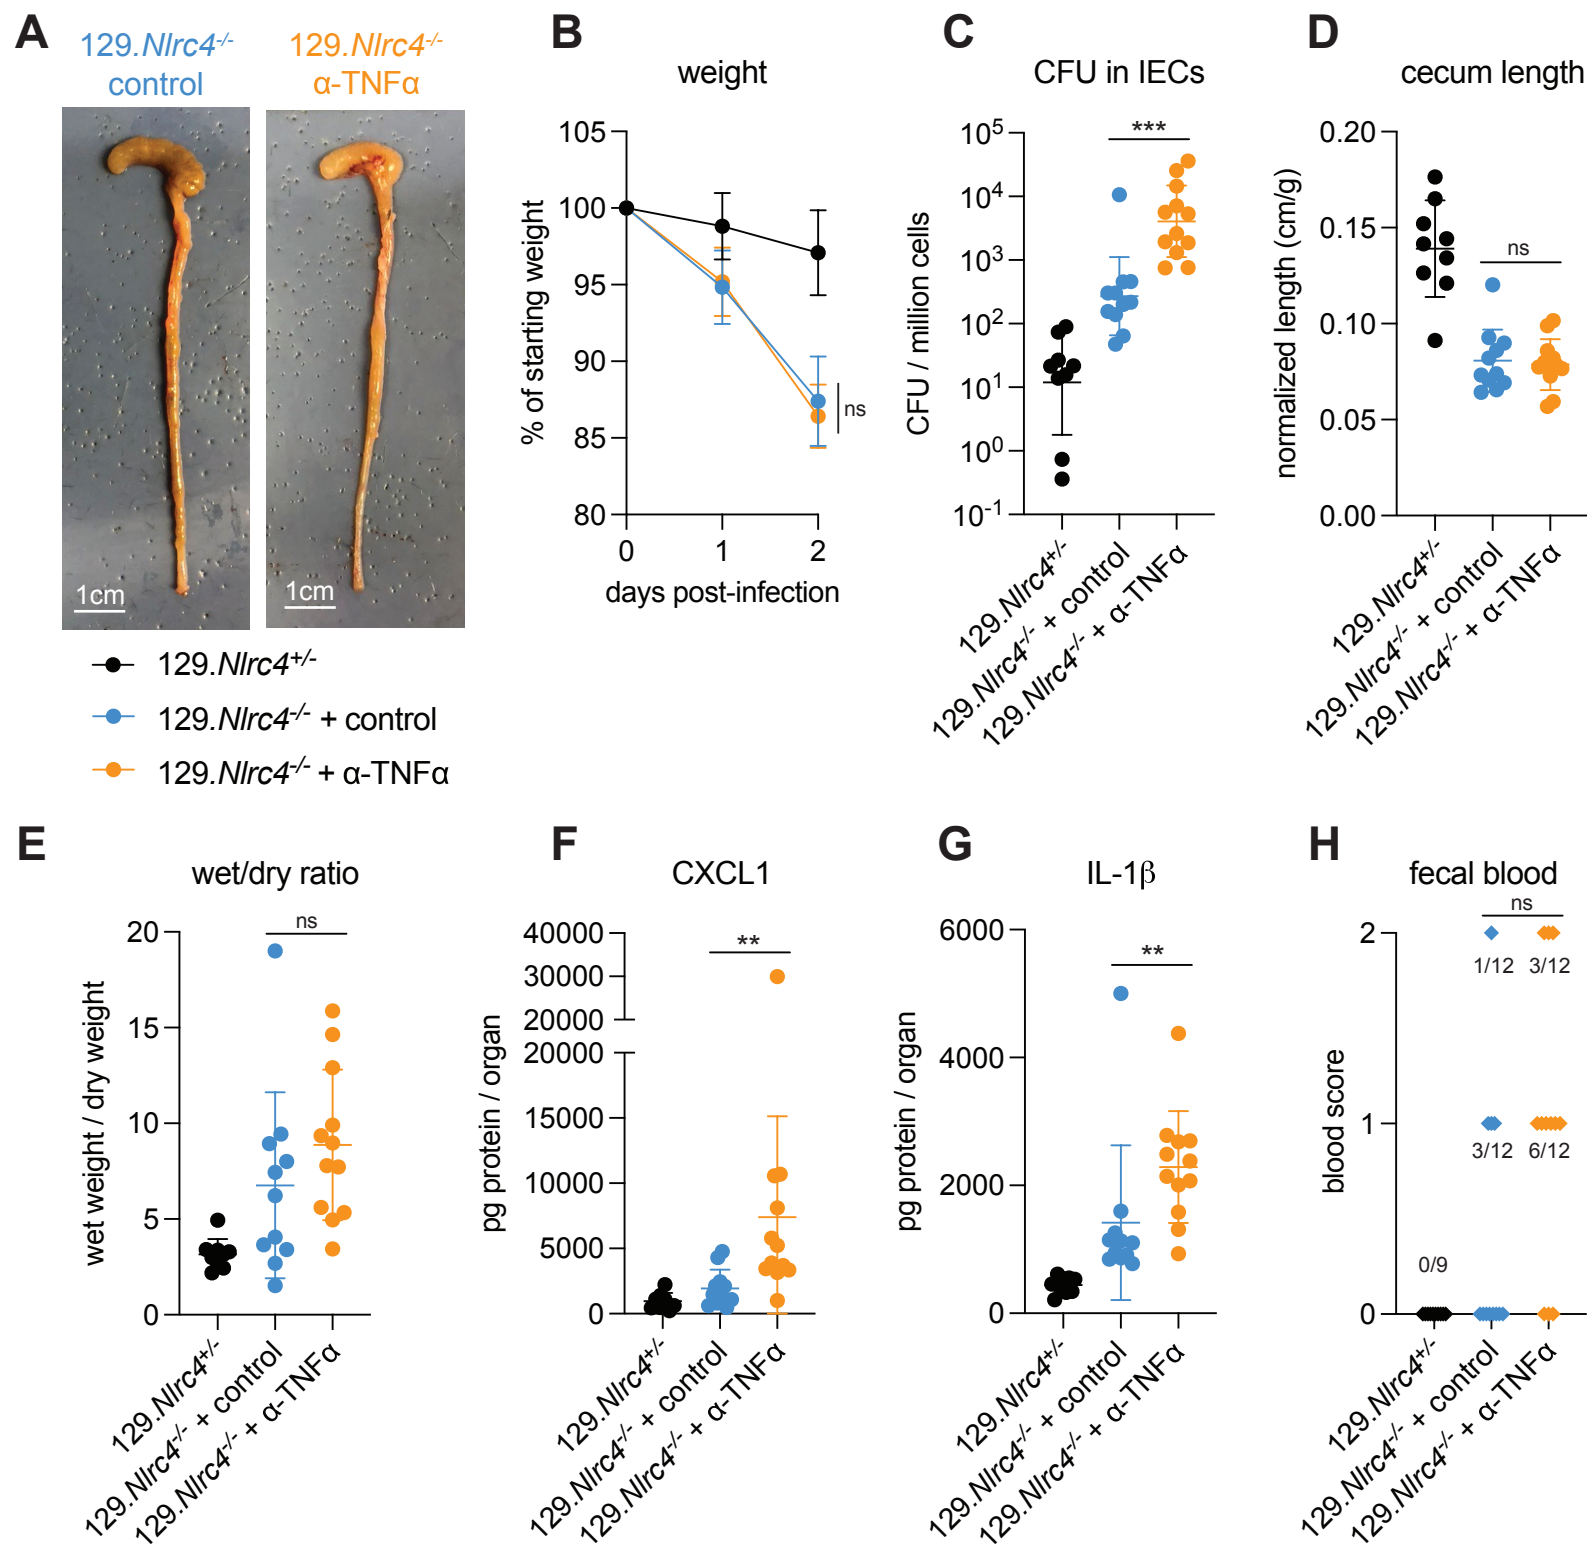

Supplement: supp [file elife_poa_e83639_Figure_7_figure_supplement_1.pdf › elife_poa_e83639_Figure_7_figure_supplement_1.pdf]
